# Supplementary material
Source: PubMed Central journal article supplement (PMC8550952)
Supplement: mmc1.pdf [file mmc1.pdf]

### Supplementary appendix 1

This translation in Portuguese was submitted by the authors and we reproduce it as supplied. It has not been peer reviewed. The Lancet's editorial processes have only been applied to the original in English, which should serve as reference for this manuscript.

Esta tradução em português foi submetida pelos autores e nós não fizemos quaisquer alterações. Esta versão não foi revista por pares. O processo editorial do The Lancet só foi aplicado à versão original em inglês, que deve servir como referência para este artigo.

Supplement to: Reis G, dos Santos Moreira-Silva EA, Medeiros Silva DC, et al. Effect of early treatment with fluvoxamine on risk of emergency care and hospitalisation among patients with COVID-19: the TOGETHER randomised, platform clinical trial. *Lancet Glob Health* 2021; published online Oct 27. [http://dx.doi.org/10.1016/S2214-109X\(21\)00448-4](http://dx.doi.org/10.1016/S2214-109X(21)00448-4).

**Fundamentos** As evidências recentes indicam um potencial papel terapêutico da fluvoxamina para a COVID-19. No ensaio clínico TOGETHER para pacientes agudamente sintomáticos com COVID-19, objetivamos avaliar a eficácia da fluvoxamina versus placebo na prevenção da hospitalização definida como retenção em um ambiente de emergência COVID-19 > 06 hs ou transferência para um hospital terciário devido à COVID-19.

**Métodos** Este ensaio clínico randomizado e placebo controlado, em plataforma adaptativa, realizado em adultos brasileiros sintomáticos de alto risco, com teste positivo para a SARS-CoV-2, incluiu participantes elegíveis de 11 centros clínicos no Brasil, com um fator de risco conhecido para a progressão para doença grave. Os doentes foram aleatoriamente atribuídos (1:1) quer para a fluvoxamina (100 mg duas vezes por dia durante 10 dias) ou placebo (ou outros grupos de tratamento não reportados aqui). A equipe do estudo, o pessoal do centro e os pacientes não tinham conhecimento acerca da alocação do tratamento. Nosso desfecho primário foi um desfecho composto de hospitalização definido como retenção em um ambiente de emergência COVID-19 ou transferência para um hospital terciário devido a COVID-19 até 28 dias após a randomização com base na intenção de tratamento. A intenção modificada de tratar pacientes explorados que receberam pelo menos 24 h de tratamento antes de um evento de desfecho primário e a análise por protocolo explorou pacientes com um alto nível de adesão (>80%). Utilizamos uma estrutura analítica Bayesiana para estabelecer os efeitos juntamente com a probabilidade de sucesso da intervenção em comparação com placebo. O estudo é registrado no [clinicaltrials.gov](https://clinicaltrials.gov) (NCT04727424) e está em andamento.

**Resultados** A equipe do estudo selecionou 9803 participantes potenciais para este ensaio clínico. O ensaio clínico foi iniciado em 2 de junho de 2020, e o protocolo atual com o braço de randomização para fluvoxamina de 20 de janeiro de 2021 a 5 de agosto de 2021, quando este foi interrompido por superioridade. 741 pacientes foram alocados para a fluvoxamina e 756 para o placebo. A idade média dos participantes foi de 50 anos (variação de 18-102 anos); 58% eram do sexo feminino. A proporção de pacientes observados em um ambiente de emergência COVID-19 por mais de 6 h ou transferidos para um hospital terciário devido à COVID-19 foi menor para o grupo da fluvoxamina em comparação ao placebo (79 [11%] de 741 vs 119 [16%] de 756); risco relativo [RR] 0.68; 95% intervalo de confiança Bayesiana [95% BCI]: 0.52-0.88), com uma probabilidade de superioridade de 99.8%, ultrapassando o limiar de superioridade pré estabelecido de 97.6% (diferença de risco de 5.0%). Considerando o desfecho primário observado, 87% foram hospitalizações. Os resultados para o desfecho primário foram semelhantes para a análise de intenção de tratamento modificada (RR 0.69, 95% BCI 0.53-0.90) e maiores na análise por protocolo (RR 0.34, 95% BCI, 0.21-0.54). Houve 17 óbitos no grupo da fluvoxamina e 25 óbitos no grupo do placebo na análise primária de intenção de tratamento (odds ratio [OR] 0.68, 95% CI: 0.36-1.27). Houve um óbito no grupo da fluvoxamina e 12 no grupo do placebo para a população por protocolo (OR 0.09; IC 95% 0.01-0.47). Não encontramos diferenças significativas no número de eventos adversos associados ao tratamento entre os pacientes do grupo da fluvoxamina e placebo.

**Interpretação** O tratamento com fluvoxamina (100 mg duas vezes por dia durante 10 dias) entre pacientes ambulatoriais de alto risco e com diagnóstico recente de COVID-19 reduziu a necessidade de hospitalização definida como retenção em uma unidade de emergência ou a transferência para uma internação de retaguarda.
